1 **A series of dual-reporter vectors for ratiometric analysis of protein abundance in**  
2 **plants**

3

4 Aashima Khosla<sup>1</sup>, Cecilia Rodriguez-Furlan<sup>1</sup>, Suraj Kapoor<sup>2</sup>, Jaimie M. Van Norman<sup>1</sup>,  
5 David C. Nelson<sup>1\*</sup>

6

7 <sup>1</sup>Department of Botany and Plant Sciences, University of California, Riverside, CA  
8 92521 USA

9 <sup>2</sup>Department of Genetics, University of Georgia, Athens, GA 30602 USA

10

11 **ABSTRACT**

12 Ratiometric reporter systems enable comparisons of the abundance of a protein of  
13 interest, or “target,” relative to a reference protein. Both proteins are encoded on a single  
14 transcript but are separated during translation. This arrangement bypasses the potential  
15 for discordant expression that can arise when the target and reference proteins are  
16 encoded by separate genes. We generated a set of 18 Gateway-compatible vectors  
17 termed pRATIO that combine a variety of promoters, fluorescent and bioluminescent  
18 reporters, and 2A “self-cleaving” peptides. These constructs are easily modified to  
19 produce additional combinations or introduce new reporter proteins. We found that  
20 mScarlet-I provides the best signal-to-noise ratio among several fluorescent reporter  
21 proteins during transient expression experiments in *Nicotiana benthamiana*. Firefly and  
22 Gaussia luciferase also produce high signal-to-noise in *N. benthamiana*. As proof of  
23 concept, we used this system to investigate whether degradation of the receptor KAI2  
24 after karrikin treatment is influenced by its subcellular localization. KAI2 is normally found  
25 in the cytoplasm and the nucleus of plant cells. In *N. benthamiana*, karrikin-induced  
26 degradation of KAI2 was only observed when it was retained in the nucleus. These  
27 vectors are tools to easily monitor *in vivo* the abundance of a protein that is transiently  
28 expressed in plants, and will be particularly useful for investigating protein turnover in  
29 response to different stimuli.

## 30 INTRODUCTION

31  
32 Dynamic monitoring of protein abundance *in vivo* requires an easily detectable reporter  
33 system. Translational fusions of fluorescent or bioluminescent proteins to a protein of  
34 interest, here referred to as a “target,” are commonly used for this purpose (Bronstein et  
35 al., 1994; Wood, 1995; Genové et al., 2005). Stable transformation of a host organism  
36 with the target-encoding construct is typically carried out to produce a replicable and  
37 relatively homogeneous reporter line, although genetic instability or gene silencing may  
38 occur over subsequent generations (Vaucheret et al., 1998). The local genetic context  
39 (e.g. chromatin state or nearby enhancer elements) can influence the expression of a  
40 transgene. Therefore, isolation of multiple homozygous transgenic lines is typically  
41 required to identify one with consistent and readily detectable expression of the target.  
42 For many experiments, the cost and time involved in developing many transgenic reporter  
43 lines can discourage rapid progress. This can be resolved with transient transformation  
44 and expression of a reporter construct, which in plant biology research is often carried out  
45 in protoplasts or *Nicotiana benthamiana* (hereafter referred to as tobacco) leaves (Yang  
46 et al., 2000; Wroblewski et al., 2005). In transient expression experiments, a second  
47 reporter protein that can function as a reference is useful to normalize for differences in  
48 transformation efficiency or transgene expression across samples.

49  
50 There are several ways to achieve a dual reporter system. Perhaps the most commonly  
51 used approach is co-transformation of separate target- and reference-encoding plasmids  
52 (Larrieu et al., 2015; De Sutter et al., 2005). This does not guarantee that both constructs  
53 enter each cell, or that they do so with consistent proportions. Differences in the size of  
54 each plasmid may also impact their relative transformation efficiencies. An improvement  
55 on this method is to encode the target and reference protein on the same plasmid with  
56 each regulated by its own promoter and transcriptional termination sequence (Moyle et  
57 al., 2017; Koo et al., 2007). This can work well, but potential problems include the  
58 increased plasmid size, the relative activity of the two promoters if they are different, and  
59 recombination between promoters or terminators if they are identical.

60 Furthermore, the order in which the genes are expressed in the vector can influence their  
61 expression levels (Halpin, 2005).

62

63 An attractive third option is to encode the target and reference protein on the same  
64 transcript. This avoids variation in the relative expression of the target and reference  
65 genes that may occur in different cell types or environmental conditions, as transcription  
66 of both genes will be affected equally. Multicistronic gene expression can be achieved in  
67 eukaryotes through incorporation of an internal ribosome entry site (IRES) or a sequence  
68 encoding a 2A “self-cleaving” peptide between the target and reference genes. IRES  
69 sequences produce a secondary structure in the mRNA that enables translation to occur  
70 downstream (Urwin et al., 2000). The efficiency of translation for proteins encoded  
71 upstream and downstream of the IRES can vary widely depending on the IRES sequence  
72 selected (Urwin et al., 2002). Studies comparing the expression levels of two cDNA  
73 sequences separated by an IRES have shown that genes cloned downstream of the IRES  
74 were expressed at significantly lower levels (10 – 50% of the upstream gene) (Mizuguchi  
75 et al., 2000). A second drawback of IRES sequences is that they are somewhat large,  
76 typically ~500 to 600 bp. Because of this, 2A peptides have become a commonly used  
77 alternative to produce multicistronic expression in eukaryotes.

78

79 The 2A peptide from foot-and-mouth disease virus (FMDV, “F2A”) and several 2A-like  
80 sequences are able to disrupt normal translation, causing a protein encoded downstream  
81 of 2A to be translated separately from a protein encoded upstream (Halpin et al., 1999;  
82 Ralley et al., 2004; Luke et al., 2015). This “ribosome skipping”, “stop-go”, or “self-  
83 cleavage” effect occurs when the ribosome fails to create a glycyl-prolyl bond at the end  
84 of the 2A peptide but then continues translation (Atkins et al., 2007; Doronina et al., 2008).  
85 The first protein retains the majority of the 2A peptide as a C-terminal fusion, while the  
86 proline residue becomes the N-terminus of the second protein (Donnelly et al., 2001c,  
87 2001a; Luke and Ryan, 2018). Cleavage is thought to be caused by interaction of the  
88 nascent 2A peptide with the ribosomal exit tunnel. Indeed the length of the 2A peptide  
89 impacts its cleavage efficiency. A minimum of 13 amino acids of F2A are required for  
90 cleavage, but longer versions are more effective. Including residues from the 1D capsid

91 peptide encoded upstream of 2A in FMDV can further increase the cleavage efficiency of  
92 a 2A sequence (Donnelly et al., 2001a; Minskaia et al., 2013). While longer versions have  
93 been shown to produce the most efficient cleavage, in some cases the ‘remnant’ 2A  
94 residues appended to the C-terminus of a processed protein may hinder its activity  
95 (François et al., 2004; Randall, 2004; Samalova et al., 2006). Removal of the extraneous  
96 2A residues using endogenous proteases has been attempted in plant (François et al.,  
97 2004) and mammalian systems (Fang et al., 2005). Conversely, when shorter 2A  
98 sequences are used the C-terminal sequence of the upstream protein can impact  
99 cleavage efficiency (Minskaia et al., 2013). For shorter 2As, cleavage efficiency has been  
100 improved by insertion of a flexible Gly-Ser-Gly or Ser-Gly-Ser-Gly spacer sequence  
101 between the upstream protein and the 2A sequence (Fang et al., 2005; Lorens et al.,  
102 2004; Szymczak et al., 2004a; Provost et al., 2007).

103

104 Several studies have used 2A peptides in dual reporter systems in plants. For example,  
105 Wend *et al.* developed a degradation-based biosensor to study auxin dynamics in  
106 transient expression systems (Wend et al., 2013). The chemiluminescent sensor is  
107 composed of two components: a Aux/IAA degron fused to firefly luciferase (LUC) as a  
108 target, and Renilla luciferase as a reference. Both components are linked by a 23 aa F2A  
109 peptide. In the presence of auxin and the co-receptor F-box protein TIR1, the target is  
110 degraded. Samodelov *et al.* used a similar degradation-based sensor, termed  
111 StrigoQuant, to monitor strigolactone signaling in plant protoplasts (Samodelov et al.,  
112 2016). This construct expressed SUPPRESSOR OF MORE AXILLARY GROWTH2-  
113 LIKE6 (SMXL6) fused to LUC as a target, and Renilla luciferase as a reference.  
114 Separation of the target and reference proteins was achieved by the same 23 aa F2A  
115 peptide as Wend et al. The SMXL6-LUC target is degraded after strigolactone perception.  
116 Samalova *et al.* utilized a fluorescent reporter to study plant membrane trafficking in both  
117 transiently and stably transformed systems (Samalova et al., 2006). A 20 aa F2A peptide  
118 was used to co-express a trafficked fluorescent protein marker in fixed stoichiometry with  
119 a reference fluorescent protein localized to a different cellular compartment.

120 We are interested in developing a similar ratiometric system to report on signaling activity  
121 in the karrikin pathway in plants. Karrikins (KARs) are a class of butenolide compounds  
122 found in smoke that can stimulate seed germination and enhance the photomorphogenic  
123 growth of *Arabidopsis thaliana* seedlings (Flematti et al., 2004; Nelson et al., 2009, 2010,  
124 2012). KAR responses in plants require the *a/b*-hydrolase protein KARRIKIN  
125 INSENSITIVE2 (KAI2)/HYPOSENSITIVE TO LIGHT (HTL) (Waters et al., 2012; Sun and  
126 Ni, 2011). *KAI2* has roles in germination, hypocotyl elongation, drought tolerance, root  
127 skewing, root hair development, and symbiotic interactions with arbuscular mycorrhizal  
128 fungi (Gutjahr et al., 2015; Li et al., 2017; Villaécija-Aguilar et al., 2019; Swarbreck et al.,  
129 2019). In addition to mediating KAR responses, it is thought that KAI2 recognizes an  
130 unknown, endogenous signal known as KAI2 ligand (KL) (Conn and Nelson, 2015). If so,  
131 KARs might be natural analogs of KL, to which some fire-following species have become  
132 particularly attuned.

133  
134 KAI2 works with the F-box protein MORE AXILLARY GROWTH2 (MAX2) to mediate KAR  
135 responses, likely through polyubiquitination and degradation of SUPPRESSOR OF MAX2  
136 1 (SMAX1) and SMAX1-LIKE2 (SMXL2) (Nelson et al., 2011; Stanga et al., 2013, 2016).  
137 KAR treatment causes degradation of KAI2 protein over the course of several hours,  
138 putatively as a form of negative feedback regulation (Waters et al., 2015). Proteolysis of  
139 KAI2 occurs independently of MAX2 through a mechanism that is currently unknown.  
140 Substitution of Ser95, one of the catalytic triad residues, with alanine renders KAI2 non-  
141 functional and also prevents its degradation in the presence of KAR<sub>2</sub> (Waters et al., 2015).  
142 Potentially, KAI2 degradation could be used as the basis of an *in vivo* reporter for its  
143 activation. Such a bioassay could be useful in attempts to identify KL through fractionation  
144 of small molecule extracts from plants.

145  
146 This led us to develop a series of Gateway-compatible, plant transformation vectors for  
147 ratiometric detection of a protein of interest in transient expression assays. We tested the  
148 cleavage efficiency of two versions of the foot-and-mouth disease virus (FMDV) 2A  
149 peptide. We compared the signal-to-noise ratio of several fluorescent and bioluminescent  
150 reporters transiently expressed in *Nicotiana benthamiana* to identify those with the largest

151 potential dynamic range. Finally, as proof-of-concept, we used the ratiometric system to  
152 investigate KAR-activated proteolysis of KAI2.

153

## 154 **RESULTS**

155

### 156 **Design of pRATIO vectors**

157 We constructed a series of 18 Gateway-compatible binary vectors named pRATIO that  
158 encode multicistronic ratiometric reporters (Figure 1). A gene of interest can be  
159 transferred readily from an entry clone into the destination vector through an LR Gateway  
160 reaction (Invitrogen). The target is composed of a gene of interest that has an in-frame,  
161 C-terminal fusion to a fluorescent or bioluminescent reporter gene. This is followed by a  
162 2A peptide-encoding sequence and a second fluorescent or bioluminescent reporter gene  
163 that serves as a reference. After the 2A peptide interrupts translation the ribosome may  
164 fall off instead of resuming translation of the next coding sequence; typically this results  
165 in a higher molar ratio of the first protein product vs. the second (Donnelly et al., 2001b;  
166 Liu et al., 2017). Therefore, to maximize target signal, we chose to encode the target  
167 protein first. Expression of the multicistronic transcript is controlled by a single promoter  
168 and nopaline synthase terminator ( $T_{nos}$ ). We selected the *35Sp* from cauliflower mosaic  
169 virus, which is commonly used to drive strong expression of transgenes in plants.  
170 However, *35Sp* is not equally expressed across all tissue types and can be prone to  
171 silencing (Elmayan and Vaucheret, 1996). To achieve more uniform expression of the  
172 ratiometric construct, several pRATIO vectors carry the *UBIQUITIN 10* promoter  
173 (*UBQ10p*) from *Arabidopsis thaliana*. *UBQ10p* works well for transient expression in  
174 *Arabidopsis* and tobacco tissues, and is equally useful for generating stable transgenic  
175 lines (Grefen et al., 2010). Some pRATIO vectors include a nuclear localization sequence  
176 (NLS) from the SV40 large T antigen that is translationally fused to the N-terminus of the  
177 target. In some cases, the presence of an NLS can facilitate the detection of weak  
178 fluorescent reporter signals by concentrating the signal in the nucleus (Takada and  
179 Jürgens, 2007).

180 The pRATIO vectors are designed to allow for independent exchange or dropout of any  
181 vector element using unique restriction endonuclease sites (Figure 1A). This can be  
182 accomplished through classical restriction enzyme-mediated subcloning techniques.  
183 Alternatively, a digested pRATIO vector and an insert fragment that is bordered by 15-bp  
184 sequences that match the vector ends can be assembled seamlessly with a commercially  
185 available enzyme mix such as NEBuilder (New England Biolabs).

186

### 187 **2A-mediated cleavage of transiently expressed reporters in tobacco**

188 The target and reference proteins are intended to separate during translation due to the  
189 action of an intervening FMDV 2A (F2A) peptide. The F2A peptide itself is 19 aa long and  
190 is sufficient for some degree of cleavage. However, longer versions of F2A that include  
191 portions of the 1D capsid protein encoded upstream in FMDV typically produce higher  
192 levels of cleavage. N-terminal extension of 2A with 5 aa of 1D improves cleavage, but  
193 extension with 14, 21, and 39 aa of 1D produces complete cleavage and an equal  
194 stoichiometry of the upstream and downstream translation products (Donnelly et al.,  
195 2001a; Ryan et al., 1991).

196

197 The pRATIO1100 and pRATIO2100 series use a 30 aa version of F2A (11 aa of 1D plus  
198 2A) while the pRATIO1200, pRATIO2200, pRATIO3200, and pRATIO4200 series use a  
199 40 aa F2A sequence (21 aa of 1D plus 2A). We further modified the 40 aa F2A at its N-  
200 terminus to include a 9 aa LP4 linker peptide and a flexible Gly-Ser-Gly linker, producing  
201 \*F2A (Figure 2A). This strategy is based upon a hybrid linker that fuses LP4, the fourth  
202 linker peptide of a polyprotein precursor found in *Impatiens balsamina* seed, to a 20 aa  
203 F2A peptide (Tailor et al., 1997). LP4 is post-translationally cleaved after the first or  
204 second aa, enabling removal of almost the entire linker from the N-terminal protein  
205 (François et al., 2002, 2004). Inclusion of a Gly-Ser-Gly linker at the N-terminal end of a  
206 2A peptide can improve cleavage efficiency (Szymczak et al., 2004b; Holst et al., 2006;  
207 Kim et al., 2011; Chng et al., 2015).

208

209 To compare the effectiveness of F2A and \*F2A, we cloned an *Arabidopsis KAI2* cDNA  
210 into pRATIO1112 and pRATIO1212. We then transiently expressed the constructs in

211 tobacco leaves via *Agrobacterium tumefaciens*-mediated transformation. These reporter  
212 systems should produce a NLS-KAI2-mScarlet-I target and a Venus reference protein.  
213 Fluorescence microscopy of leaf epidermal cells indicated nuclear localization of  
214 mScarlet-I (Figure 2B,C). In contrast, Venus was found in both the cytoplasm and  
215 nucleus, as expected for an untargeted monomeric fluorescent protein (FP). These  
216 observations were consistent with successful separation of the target and reference  
217 proteins.

218  
219 We further examined the cleavage efficiency of F2A and \*F2A through Western blot  
220 analysis of total proteins extracted from transiently transformed tobacco leaves. Leaves  
221 transformed with p19 alone, which suppresses gene silencing during transient  
222 expression, were used as a negative control. We observed very little uncleaved protein  
223 (~87 kDa) compared to NLS-KAI2-mScarlet-I (~60 kDa) and Venus (27 kDa) in leaves  
224 transformed with pRATIO1112-KAI2 and pRATIO1212-KAI2 (Figure 2D). The two  
225 versions of 2A peptide performed similarly well; based on the anti-Venus blot we  
226 estimated cleavage efficiencies of 92% for F2A and 95% for \*F2A (Figure 2E).

227  
228 The LP4 linker peptide was included to further improve cleavage efficiency through post-  
229 translational processing and also to remove the F2A peptide from the C-terminus of the  
230 target. We noted that KAI2-mScarlet-I migrated at a slightly higher molecular weight when  
231 \*F2A was used compared to F2A (Figure 2D). This suggested that cleavage of LP4 might  
232 not be occurring as anticipated. Therefore, we probed both samples with a monoclonal  
233 antibody against 2A peptide. We found that KAI2-mScarlet-I had retained its 2A peptide  
234 in pRATIO1212-KAI2 samples, indicating the LP4 linker component of \*F2A was not  
235 effective (Supplemental Figure 2).

236  
237 All considered, \*F2A did not appear to offer a clear advantage over F2A; the cleavage  
238 efficiencies of these two peptides were similar and \*F2A adds an extra 22 aa to the C-  
239 terminus of the target protein compared to F2A. However, we noted that the abundance  
240 of target and reference proteins appeared to be higher in \*F2A samples than F2A samples  
241 (Figure 2D). A non-specific protein bound by the GFP antibody had approximately equal



242 abundance in F2A and \*F2A samples. In contrast, target and reference proteins were  
243 roughly 2-fold higher in the \*F2A samples than in F2A samples (Figure 2D, F). This  
244 suggested that \*F2A promotes more efficient translation of a polycistronic transcript than  
245 F2A, and therefore may be a better choice for some applications.

246

### 247 **Comparison of fluorescent and luminescent reporter proteins in tobacco leaves**

248 We set out to identify reporter proteins that would be most detectable after transient  
249 expression in tobacco leaves. Various FPs with different spectral properties have been  
250 developed and used to analyze the dynamics of protein localization *in planta*, most  
251 commonly in roots. Photosynthetic tissues, however, pose a particular challenge for  
252 detecting FPs due to high background autofluorescence, e.g. from chlorophyll. We  
253 selected four intrinsically bright, monomeric fluorescent reporters to test: mScarlet-I,  
254 mNeonGreen, mCerulean-NLS, and Venus. We synthesized plant codon-optimized forms  
255 of mScarlet-I, mNeonGreen, and mCerulean-NLS.

256

257 We selected FPs that could be paired as dual reporters with minimal spectral overlap.  
258 mScarlet-I is a novel bright monomeric RFP (red fluorescent protein) with a Thr74Ile  
259 mutation that results in high photostability, fast maturation (< 40 min), and a high quantum  
260 yield (0.54) that is 2.5 times brighter than mCherry (Bindels et al., 2017). mScarlet-I has  
261 been used in live cell imaging in Arabidopsis (Kimata et al., 2019). In the green range, we  
262 chose mNeonGreen, a bright and stable green-yellow fluorescent protein derived from  
263 monomerization of the tetrameric yellow fluorescent protein LanYFP (Shaner et al., 2013).  
264 mNeonGreen is about 3-5 times brighter than GFP and EGFP, and its maturation time is  
265 about 3-fold less than EGFP (Shaner et al., 2013; Cranfill et al., 2016; Rodriguez et al.,  
266 2017; Steiert et al., 2018). Despite being a relatively new fluorescent protein, it has been  
267 successfully expressed in several plant species such as *A.thaliana*, *N.benthamiana*, and  
268 rice (Kimata et al., 2019; Kato et al., 2019; Pasin et al., 2014; Stoddard and Rolland,  
269 2019; Luginbuehl et al., 2019). mCerulean is a notable *Aequorea* GFP variant that is cyan  
270 in color (Rizzo et al., 2004). It is reported to be a very rapidly maturing monomer. The  
271 S72A/Y145A/H148D/A206K amino acid substitutions found in mCerulean make it more  
272 photostable and 2.5 times brighter than ECFP (Rizzo et al., 2004; Rizzo and Piston,

273 2005). In the yellow range, we selected Venus, an improved version of YFP (yellow  
274 fluorescent protein) with a novel F46L mutation (Nagai et al., 2002). Due to its enhanced  
275 brightness and fast maturation time (<20 min), Venus has been utilized in the  
276 development of ratiometric sensors such as DII-VENUS and Jas9-VENUS, which monitor  
277 proteins that undergo rapid turnover (Brunoud et al., 2012; Larrieu et al., 2015).

278

279 We used spectral scanning to identify excitation and emission wavelengths for each FP  
280 that produced the strongest signal above background autofluorescence of tobacco  
281 leaves. In some cases, these differed from the peak wavelengths identified from *in vitro*  
282 studies of the FPs (Table S2). We performed tests with a KAI2 target protein to evaluate  
283 the performance of pRATIO vectors containing mScarlet-I/Venus,  
284 mNeonGreen/mScarlet-I, and mScarlet-I/mCerulean reporter pairs (Figure 3A). The  
285 constructs were introduced into tobacco leaves by *Agrobacterium*-mediated  
286 transformation. After 3 days, fluorescence signals from leaf discs were measured in a  
287 microplate reader equipped with linear variable filters (Table S2). Among the four  
288 fluorescent proteins, the ratio of signal to background was highest for mScarlet-I, ranging  
289 from 40-fold to 156-fold (Figure 3B). The superior performance of mScarlet-I is likely a  
290 combination of its exceptional brightness for a red FP and the comparably low  
291 autofluorescence from tobacco leaves at its optimal excitation and emission settings  
292 (Bindels et al., 2017; Thorn, 2017). Venus also worked well, with a signal intensity 46-fold  
293 higher than background. In contrast, background autofluorescence was much higher  
294 under mNeonGreen and mCerulean filter settings, limiting the potential dynamic range  
295 and utility of these FPs in leaf tissue assays.

296

297 Bioluminescent reporter proteins potentially offer greater sensitivity and dynamic ranges  
298 for quantitation than fluorescent reporters, with the drawback that they must be supplied  
299 with substrates to enable detection. We selected three luciferases to test. LUC2 is an  
300 improved version of the firefly luciferase isolated from *Photinus pyralis* (Mašek et al.,  
301 2013). LUC2 requires ATP and molecular oxygen to catalyze the yellow light-emitting  
302 reaction with its substrate, D-luciferin (Marques and Esteves da Silva, 2009). *P. pyralis*  
303 luciferase and optimized variants of it have been used in many *in vivo* imaging

304 experiments in plants, perhaps most famously for tracking circadian clock-regulated gene  
305 expression over the course of several days. A mutant form of luciferase from the  
306 Japanese firefly, *Luciola cruciata*, that has a red-shifted emission spectrum (here referred  
307 to as redLUC) was also chosen (Kajiyama and Nakano, 1991; Tafreshi et al., 2008).  
308 redLUC also uses D-luciferin as a substrate (Branchini et al., 2005). Because of spectral  
309 overlap, however, redLUC and LUC2 are not a suitable pair for dual-luciferase assays.  
310 Instead, redLUC combines well in dual-luciferase assays with *Gaussia Dura* luciferase  
311 (gLUC), a mutated blue variant of a luciferase from the marine copepod *Gaussia princeps*  
312 that confers stabilized luminescence (Welsh et al., 2009; Markova et al., 2019). gLUC is  
313 one of the smallest and brightest luciferases currently known. It catalyzes the oxidative  
314 decarboxylation of coelenterazine in an ATP-independent manner to produce blue light  
315 with a peak wavelength around 480 nm (Tannous et al., 2005). Because the  
316 luminescence from redLUC and gLUC can be spectrally resolved, simultaneous  
317 measurement of both reporters can be accomplished without the need for two-step  
318 addition of substrates or quenching.

319

320 We synthesized coding sequences for *LUC2*, *redLUC*, and *gLUC* that were codon-  
321 optimized for expression in *Arabidopsis thaliana* and generated several pRATIO vectors  
322 that incorporate these reporters. We tested pRATIO1231-KAI2 and pRATIO1267-KAI2,  
323 which respectively use LUC2/mScarlet-I and redLUC/gLUC as target/reference reporters.  
324 In comparison to FPs, firefly luciferase proteins expressed in tobacco leaves had a  
325 substantially higher ratio of luminescence signal to background, due to substantially lower  
326 background signals. gLUC also performed well, but had higher background signal,  
327 possibly due to luciferase-independent decomposition of the coelenterazine substrate  
328 (Figure 3C).

329

### 330 **Ratiometric analysis of KAI2 degradation in *N.benthamiana***

331 Having developed ratiometric dual-fluorescent and dual-luminescent reporters, we  
332 investigated whether KAR-induced degradation of *Arabidopsis* KAI2 can be observed in  
333 tobacco. We cloned *KAI2* and the catalytically inactive S95A allele of *kai2* into  
334 pRATIO4212, which uses a *UBQ10* promoter and mScarlet-I/Venus reporters. Transient

335 expression of these constructs in tobacco leaf epidermal cells showed that KAI2-  
336 mScarlet-I and kai2<sup>S95A</sup>-mScarlet-I were localized to the cytoplasm and the nucleus  
337 (Figure 4A). This was consistent with the subcellular localization of KAI2 in *Arabidopsis*  
338 (Sun and Ni, 2011). After 12 h of treatment with 10  $\mu$ M KAR<sub>2</sub>, we did not observe a decline  
339 in the target to reference ratio for either KAI2 or kai2<sup>S95A</sup> (Figure 4C). We performed  
340 similar tests with pRATIO3267, which uses a 35S promoter and redLUC/gLUC reporters.  
341 Again, we did not observe a decline in the target to reference ratio after KAR<sub>2</sub> treatment  
342 with either KAI2 protein (Figure 4D).

343

344 Unlike KAI2, its signaling partner MAX2 is only found in the nucleus of *Arabidopsis* cells  
345 (Stirnberg et al., 2007; Shen et al., 2007). In addition, SMAX1, the target of KAI2, co-  
346 localizes with TOPLESS(TPL)/TPL-RELATED(TPR) proteins in the nucleus, which is  
347 consistent with the nuclear localization pattern of the homologous D53-type SMAX1-LIKE  
348 (SMXL) proteins (Jiang et al., 2013; Zhou et al., 2013; Soundappan et al., 2015; Wang et  
349 al., 2015; Liang et al., 2016). This led us to test whether the subcellular localization of  
350 KAI2 influences its potential to be degraded after KAR treatment.

351

352 Therefore, we examined KAI2 degradation with pRATIO2212 and pRATIO1267, which  
353 are respectively identical to pRATIO4212 and pRATIO3267 but add an NLS to the N-  
354 terminus of the target protein. Transient expression of pRATIO4212-KAI2 and -kai2<sup>S95A</sup>  
355 in tobacco produced KAI2 fusion proteins that were exclusively localized to the nucleus.  
356 In contrast to our prior results, we observed that the target to reference ratio of NLS-KAI2  
357 decreased after KAR<sub>2</sub> treatment when either the dual-fluorescent or dual-luminescent  
358 reporter system was used. No decline was observed for NLS-kai2<sup>S95A</sup> targets after KAR<sub>2</sub>  
359 treatment (Figure 4E,F). This is consistent with the importance of Ser95 for KAR signaling  
360 and the stability of kai2<sup>S95A</sup> in *Arabidopsis* after KAR treatment (Waters et al., 2015). Our  
361 results suggest that nuclear localization is important for KAR<sub>2</sub>-induced degradation of  
362 KAI2.

## 363 DISCUSSION

364

### 365 Functional evaluation of the pRATIO vectors

366 We developed a set of pRATIO vectors to aid studies of post-translational regulation of  
367 proteins (Figure 1). These vectors enable *in vivo* monitoring of dynamics in protein  
368 abundance in response to applied stimuli. These assays can be carried out rapidly in  
369 transient expression systems. Importantly, pRATIO vectors can normalize differences in  
370 transformation efficiency or transgene expression across samples by simultaneously  
371 expressing a reference protein from the same transcript as a target protein of interest.  
372 This is made possible by the use of a short “self-cleaving” F2A peptide derived from  
373 FMDV. To date, there has not been a comprehensive study that compares the cleavage  
374 efficiencies of different 2A peptides in plants. Of the various 2A and 2A-like peptides, the  
375 most widely used 2A sequence in plants is F2A (Halpin et al., 1999; El Amrani et al.,  
376 2004; Samalova et al., 2006; François et al., 2004; Ma and Mitra, 2002; Burén et al.,  
377 2012). We tested two long versions of the F2A peptide, one of which included a putative  
378 protease cleavage site that proved to be ineffective. We found that F2A and \*F2A have  
379 similarly high cleavage efficiencies but that \*F2A allows better protein expression (Figure  
380 2). We identified the fluorescent proteins mScarlet-I and Venus, and the bioluminescent  
381 proteins redLUC and gLUC, as particularly useful reporter pairs for ratiometric target  
382 detection in tobacco leaves (Figure 3). Their superior performance is likely due to the low  
383 background signal from green plant tissue at their detection filter settings. The pRATIO  
384 vectors have a modular configuration in which the promoter, Gateway cassette, 2A  
385 peptide, reporters are flanked by unique restriction endonuclease cleavage sites (Figure  
386 1). This makes further modification of pRATIO vectors to fit specific experimental needs  
387 easy to accomplish.

388

389 We found that *Arabidopsis* KAI2 was degraded in tobacco following KAR<sub>2</sub> treatment,  
390 demonstrating that this response is conserved between the two species (Figure 4; Waters  
391 et al., 2015). KAR-induced degradation of KAI2 was only observed when KAI2 was  
392 retained in the nucleus. Interestingly, MAX2 and SMAX1, the signaling partners of KAI2,  
393 are nuclear proteins. Although KAI2 degradation is known to be MAX2-independent,

394 future work should investigate whether it depends on KAI2 association with SMAX1 in the  
395 nucleus.

396

### 397 **Limitations of the pRATIO system**

398 We note three important limitations when using the pRATIO vectors. First, an appropriate  
399 filter set is critical to maximize the signal and reduce spectral overlap between fluorescent  
400 proteins (Tables S2, S3). We used spectral scanning to identify optimal excitation and  
401 emission settings for each fluorophore in green leaves. However, when typical filter  
402 settings for GFP (excitation 488 nm; emission 507 nm), mCherry (excitation 587 nm;  
403 emission 610 nm), and CFP (excitation 433 nm; emission 475 nm) were used to detect  
404 mNeonGreen, mScarlet-I, and mCerulean, respectively, the fluorescence signal over  
405 background was greatly diminished (data not shown). Thus, the use of some of these  
406 reporters may be limited by the availability of a multi-mode plate reader that can set  
407 continuously adjustable wavelengths and bandwidths for excitation and emission.

408

409 Second, although our \*F2A sequence produced efficient cleavage and stronger  
410 expression of target and reference proteins than F2A, it was not removed from the target  
411 post-translationally as anticipated. It is possible that the C-terminal extension may  
412 interfere with the function of a target protein or with the activity of reporter proteins. This  
413 may not pose a significant problem for pRATIO vectors, as we were able to detect all  
414 reporter proteins effectively (Supplemental Figure 1). In cases where this is a problem,  
415 however, a better alternative to \*F2A may be IntF2A, a fusion of an Ssp DnaE mini-intein  
416 variant to a long 58 aa F2A peptide (Zhang et al., 2017). IntF2A is rapidly and efficiently  
417 removed from the C-terminal end of a fusion protein through the hyper-N-terminal auto-  
418 cleaving action of the intein after translation. IntF2 has been shown to be processed  
419 efficiently in multiple organs of transgenic *Nicotiana tabacum*, and in transiently  
420 transformed *N. benthamiana* and lettuce (Zhang et al., 2017).

421

422 Third, we found pRATIO vectors to be useful in transient expression assays, but we were  
423 unable to detect the Venus or mCerulean-NLS reference proteins in transgenic  
424 *Arabidopsis thaliana* lines carrying pRATIO2212-KAI2 or pRATIO2214-KAI2 by

425 fluorescence microscopy (Supplemental Figure 3). One likely explanation is that the  
426 ribosome does not always continue translation after disruption of the glycyl-prolyl bond at  
427 the end of the 2A peptide and instead drops off (Ryan et al., 1999; Donnelly et al., 2001a;  
428 de Felipe et al., 2003; Liu et al., 2017). The high level of transient expression that can be  
429 achieved in tobacco may overcome an inefficiency in translating the reference protein.  
430 Notably, the 2A-dependent ratiometric sensors for auxin and strigolactone have only been  
431 deployed in transient expression experiments in protoplasts, raising the question of  
432 whether they are effective as stable transgenes (Wend et al., 2013; Samodelov et al.,  
433 2016).

434

435 Alternatively, 2A peptides may have different effects in different species, depending on  
436 how they interact with the ribosome. For example, the cleavage efficiencies of the 2A  
437 peptide from FMDV have ranged from 40% to 90% to nearly 100% (Donnelly et al., 2001a;  
438 Szymczak et al., 2004b; Kim et al., 2011). This variability is likely due to differences in  
439 experimental conditions, including the use of different model organisms. 2A variants  
440 found in other viruses, such as equine rhinitis A virus 2A (E2A), porcine teschovirus-1 2A  
441 (P2A), thosa asigna virus 2A (T2A), can have different activities in a given system (Ryan  
442 et al., 1991; Donnelly et al., 2001a; Szymczak and Vignali, 2005). The 22 aa version of  
443 F2A produces the least efficient cleavage of four 2A peptides tested in human cell lines,  
444 zebrafish embryos, and mouse liver. P2A is most effective, in some cases producing more  
445 than twice the cleavage efficiency of F2A (Kim et al., 2011). It is possible that other 2A  
446 forms may be more effective than F2A at inducing stop-and-go translation in transgenic  
447 plants. It will be interesting to determine whether there is a tradeoff between cleavage  
448 efficiency and the frequency of continued translation of the second coding sequence. We  
449 propose that a high cleavage efficiency should be prioritized for accurate monitoring of  
450 target/reference ratios.

451

#### 452 **Future applications for ratiometric reporters**

453 There are a number of potential applications for controlled co-expression of target and  
454 reference proteins from a single polycistronic mRNA, particularly if the reference protein  
455 can be detected in stably transformed plants. For example, the *35S* or *UBQ10* promoters

456 in a pRATIO construct could be replaced with a native promoter and coding sequence for  
457 a gene of interest. This would potentially enable monitoring of the protein distribution and  
458 transcriptional pattern of a gene in a single construct by visualizing the target and  
459 reference reporters, respectively. In addition to revealing differences in localization  
460 patterns, such a system could be used to simultaneously examine changes in gene  
461 expression at the transcript and protein levels. In the case of understanding the nature of  
462 KL, we anticipate development of a reliable reporter of KAI2 signaling activity will facilitate  
463 KL identification through bioassay-guided fractionation. Alternatively, a ratiometric  
464 reporter of KAI2 signaling may enable genetic screens for KL-deficient or -overproducing  
465 mutants.

466

## 467 **SUPPLEMENTAL DATA**

468

469 **Supplemental Figure 1.** Fluorescence microscopy images showing the expression of  
470 reference proteins in tobacco epidermal cells.

471 **Supplemental Figure 2.** Western blot analysis revealing cleavage efficiency in the 2As  
472 in tobacco epidermal cells.

473 **Supplemental Figure 3.** Reference protein is undetectable in *Arabidopsis thaliana*.

474 **Supplemental Table 1.** List of vectors in the pRATIO series.

475 **Supplemental Table 2.** Fluorescent proteins (FPs) used in this study.

476 **Supplemental Table 3.** Luciferases used in this study.

477 **Supplemental Table 4.** Primers used in this study.

478 **Supplemental Table 5.** GenBank accession numbers for the pRATIO vectors.

479

## 480 **ACKNOWLEDGEMENTS**

481

482 We gratefully acknowledge funding support from NSF IOS-1350561 (now IOS-1737153)  
483 and NSF IOS-1557962 (now IOS-1740560) to DCN, and NSF ISO-1751385 to JMVN.

484 We thank Dr. Gavin Flematti and Dr. Adrian Scaffidi (University of Western Australia) for  
485 supplying KARs.



## 486 **AUTHOR CONTRIBUTIONS**

487

488 Project and experimental design by AK and DCN. Experiments were carried out by AK,  
489 SK, and CR. All authors contributed to data analysis and interpretation. Figure  
490 preparation by AK and DCN. Manuscript preparation by AK, JMVN, and DCN.

491

## 492 **METHODS**

493

### 494 **Construction of plant transformation vectors**

#### 495 **Biological components**

496 The plant codon optimized coding sequence of *mScarlet-I*, *LUC2*, *mCerulean-NLS*, and  
497 *redLUC-<sup>\*</sup>F2A-gLUC* were synthesized in pUC57 cloning vectors (Genscript) using *KpnI* -  
498 *SacI*, *Apal-MluI*, *KpnI-SacI*, and *MluI-SacI* restriction sites, respectively. The *Arabidopsis*  
499 *UBQ10* promoter was derived from pUBQ10:YFP-GW plasmid (Michniewicz et al., 2015),  
500 plant codon optimized *mNeonGreen* from pMCS:mNeonGreen-GW plasmid (Lucia  
501 Strader, Washington University), and NLS from SV40 large T antigen.

502

503 pUC57-mScarlet-I: mScarlet-I in pUC57

504 pUC57-mCerulean: mCerulean-NLS in pUC57

505 pUC57-LUC2: LUC2 in pUC57

506 pUC57-redgLUC: redLUC-P-2A-gLUC in pUC57

507 pUC57-mNeonGreen: pUBQ10-NLS-GW-mNeonGreen-F2A-mCherry in pUC57

508

509 pUC57-mNeonGreen was used as a template to generate pRATIO2131. mScarlet-I was  
510 excised from pUC57-mScarlet-I using *KpnI-SacI* and inserted into the corresponding site  
511 of pUC57-mNeonGreen to generate pUC2131. The *HindIII-SacI* fragment of the resulting  
512 plasmid was ligated into the same sites of pGWB401 (Nakagawa et al., 2007) to generate  
513 pRATIO2131.

514

515 To create pRATIO2112, the coding sequence of *Venus* was amplified from pCN-SANB-  
516 nu3V (Wolfgang Busch, Salk Institute) using primers that introduce 5' *KpnI* site and a 3'

517 *SacI* site. The PCR product was digested with *KpnI-SacI* and inserted into *KpnI-SacI*  
518 digested pUC57-mNeonGreen. The coding sequence of *mScarlet-I* was amplified from  
519 pUC57-mScarlet-I with gene specific primers introducing a 5' *ApaI* site and 3' *MluI* site.  
520 The resulting PCR product was digested with *ApaI-MluI* and inserted into the  
521 corresponding site of pUC57-mNeonGreen to generate pUC2112. The resulting  
522 pUBQ10-NLS-GW-mScarlet-I-F2A-Venus was released from pUC57 using *HindIII-SacI*  
523 and inserted into *HindIII-SacI* digested pGWB401. Oligonucleotides used for PCR  
524 amplifications are listed in Table S4.

525 To generate pRATIO2151, LUC2 was excised from pUC57-LUC2 using *ApaI-MluI* and  
526 cloned into *ApaI-MluI* digested pUC2131 to generate pUC2151. The *HindIII-SacI*  
527 fragment of the resulting plasmid was ligated into the same sites of pGWB401 to generate  
528 pRATIO2151.

529 To create pRATIO1112, pUBQ10-NLS-GW-mScarlet-I-F2A-Venus was released from  
530 pUC2112 using *XbaI* and *SacI* restriction enzymes and cloned into *XbaI - SacI* digested  
531 pGBW402 (Nakagawa et al., 2007). pRATIO1131 and 1151 were made in a similar  
532 fashion using pUC2131 and pUC2151 as template, respectively.

533 \*F2A was excised from pUC57-redgLUC using *MluI* and *KpnI*, and subcloned into the  
534 same sites of pRATIO1112 and 1151 to create pRATIO1212 and 1251, respectively.

535 To generate pRATIO1267, pUC57-redgLUC was digested with *ApaI* and *SacI* and  
536 inserted into the corresponding site of pRATIO1212.

537 To construct pRATIO2212, pRATIO2251, and pRATIO2231, \*F2A was released from  
538 pUC57-redgLUC using *MluI* and *KpnI* and ligated into the corresponding sites of  
539 pRATIO2112, 2151, and 2231, respectively.

540 To create pRATIO2214, mCerulean-NLS was excised from pUC57-mCerulean using  
541 *KpnI* and *SacI* and ligated into *KpnI-SacI* digested pRATIO2212.

542 To construct the no NLS versions of pRATIO, NLS sequence was removed by digesting  
543 pRATIO1212, pRATIO2212-2231 with *XbaI-SpeI*, followed by self-ligation to generate  
544 pRATIO3212, pRATIO4212-4231, respectively.

545 **Transient expression in *N.benthamiana***

546 *Nicotiana benthamiana* were grown in soil in a growth room at 22°C under long day  
547 conditions (16/8 hr light dark cycle). *N. benthamiana* leaves (3 weeks old) were infiltrated  
548 with *A. tumefaciens* strain GV3101 harboring pRATIO-KAI2 fusion vectors. GV3101 cells  
549 were grown in 10 ml LB broth with antibiotics overnight at 28°C and then pelleted at 2,500  
550 xg for 10 min. Cells were then washed in 10 ml of infiltration medium (10 mM MES pH  
551 5.7, 10 mM MgCl<sub>2</sub> and 150 μM acetosyringone), centrifuged again at 2,500 xg for 5 min  
552 and resuspended in infiltration medium at an OD<sub>600</sub> of 0.2. The *Agrobacterium* solution  
553 was infiltrated in the abaxial surface of the leaf using a 1 ml syringe without a needle.  
554 After infiltration plants were placed under normal light conditions and leaves were  
555 collected after 72 hours for further analysis.

556

557 **Degradation assays in tobacco**

558 To generate pRATIO vectors with KAI2 and kai2<sup>S95A</sup> fusions, full length *KAI2* coding  
559 sequence was amplified from Col-0 cDNA and inserted into Gateway entry vector  
560 pDONR207. The resulting entry clone was then moved to the pRATIO destination vectors  
561 by gateway LR reaction. The *kai2<sup>S95A</sup>* mutant was generated with Infusion on *KAI2* entry  
562 clone described above, and subsequently recombined with pRATIO vectors.

563

564 To perform degradation assays, leaf discs were excised 3 days post infiltration and  
565 incubated at RT for 12 hr in the presence or absence of 10 μM KAR<sub>2</sub> or 0.02% acetone  
566 control. mScarlet-I (target) and Venus (reference) were excited at 560 ± 10 nm and 497  
567 ± 15 nm in a CLARIOstar plate reader (BMG Labtech, Ortenberg, Germany). Emission  
568 was recorded at 595 ± 10 nm (mScarlet-I) and 540 ± 20 nm (Venus) using black 96-well  
569 plates (Costar). Degradation was quantified as mScarlet-I/Venus fluorescence intensity  
570 ratios after background subtraction using p19 transformed leaf disc.

571

572 For luminescence-based degradation assay, redLUC and gLUC were detected at 640 ±  
573 10 nm and 480 ± 40 nm, respectively using white 96-well plates (PerkinElmer).

574 **Fluorescence and luminescence measurements**

575 Fluorescence and luminescence were measured off-line using the CLARIOstar plate  
576 reader (BMG Labtech, Ortenberg, Germany). Fluorescence intensity was measured in  
577 well scan mode of density 9x9 (9 points per well) in black, flat bottom plates. For mScarlet-  
578 I, Venus, mNeonGreen, and mCerulean detection, the optic settings (excitation, dichroic,  
579 and emission) to obtain best signal to noise ratio are listed in Table S2. Luminescence  
580 was measured in endpoint mode in white, flat bottom plates (costar). Table S3 shows the  
581 optimal filters to detect LUC2, redLUC, and gLUC signals in *N.benthamiana*.

582

583 Tobacco leaf discs were imaged 3 days after agroinfiltration on Keyence BZ-X710 epi  
584 fluorescence microscope. Fluorescence was observed using the RFP filter setting (Ex  
585 470/40 nm, Em 535/50nm) to detect mScarlet-I.

586

587 **Protein extraction and western blot analysis**

588 Transformed tobacco leaves were ground in liquid nitrogen and then resuspended hot  
589 SDS-sample buffer (100 mM Tris-HCl, pH 6.8, 2% SDS, 20% glycerol, 100 mM DTT, and  
590 0.004% bromophenol blue, 0.48 g Urea per ml). Samples were then cleaned by  
591 centrifugation at 10,000 xg at room temperature. For western blotting analysis, samples  
592 were separated on SDS-PAGE and the proteins were transferred onto PVDF membrane.  
593 Subsequently, the membrane was probed with the indicated primary antibody (rabbit anti-  
594 GFP [1:1500, Abcam, #ab290], mouse anti-RFP [1:1000, Chromotek, #6G6], and mouse  
595 anti-2A [1:1000, Sigma, #3H4]), washed with TBST, and probed with HRP-conjugated  
596 mouse anti-rabbit (1:10,000, Genscript, #A01856) and horse anti-mouse (1:5000, Cell  
597 Signaling, #7076). Blots were developed using an Azure Radiance Plus  
598 chemiluminescent substrate (#AC2102).

## 599 REFERENCES

- 600 Atkins, J.F., Wills, N.M., Loughran, G., Wu, C.-Y., Parsawar, K., Ryan, M.D., Wang, C.-H., and  
601 Nelson, C.C. (2007). A case for “StopGo”: Reprogramming translation to augment codon  
602 meaning of GGN by promoting unconventional termination (Stop) after addition of glycine  
603 and then allowing continued translation (Go). *RNA* 13: 803–810.
- 604 Bindels, D.S., Haarbosch, L., van Weeren, L., Postma, M., Wiese, K.E., Mastop, M., Aumonier,  
605 S., Gotthard, G., Royant, A., Hink, M.A., and Gadella, T.W.J., Jr (2017). mScarlet: a bright  
606 monomeric red fluorescent protein for cellular imaging. *Nat. Methods* 14: 53–56.
- 607 Branchini, B.R., Southworth, T.L., Khattak, N.F., Michelini, E., and Roda, A. (2005). Red- and  
608 green-emitting firefly luciferase mutants for bioluminescent reporter applications. *Anal.*  
609 *Biochem.* 345: 140–148.
- 610 Bronstein, I., Fortin, J., Stanley, P.E., Stewart, G.S., and Kricka, L.J. (1994). Chemiluminescent  
611 and bioluminescent reporter gene assays. *Anal. Biochem.* 219: 169–181.
- 612 Brunoud, G., Wells, D.M., Oliva, M., Larrieu, A., Mirabet, V., Burrow, A.H., Beeckman, T.,  
613 Kepinski, S., Traas, J., Bennett, M.J., and Vernoux, T. (2012). A novel sensor to map auxin  
614 response and distribution at high spatio-temporal resolution. *Nature* 482: 103–106.
- 615 Burén, S., Ortega-Villasante, C., Otvös, K., Samuelsson, G., Bakó, L., and Villarejo, A. (2012).  
616 Use of the foot-and-mouth disease virus 2A peptide co-expression system to study  
617 intracellular protein trafficking in Arabidopsis. *PLoS One* 7: e51973.
- 618 Chng, J., Wang, T., Nian, R., Lau, A., Hoi, K.M., Ho, S.C.L., Gagnon, P., Bi, X., and Yang, Y.  
619 (2015). Cleavage efficient 2A peptides for high level monoclonal antibody expression in  
620 CHO cells. *mAbs* 7: 403–412.
- 621 Conn, C.E. and Nelson, D.C. (2015). Evidence that KARRIKIN-INSENSITIVE2 (KAI2)  
622 Receptors may Perceive an Unknown Signal that is not Karrikin or Strigolactone. *Front.*  
623 *Plant Sci.* 6: 1219.
- 624 Cranfill, P.J., Sell, B.R., Baird, M.A., Allen, J.R., Lavagnino, Z., de Gruiter, H.M., Kremers, G.-J.,  
625 Davidson, M.W., Ustione, A., and Piston, D.W. (2016). Quantitative assessment of  
626 fluorescent proteins. *Nat. Methods* 13: 557–562.
- 627 De Sutter, V., Vanderhaeghen, R., Tilleman, S., Lammertyn, F., Vanhoutte, I., Karimi, M., Inzé,  
628 D., Goossens, A., and Hilson, P. (2005). Exploration of jasmonate signalling via automated  
629 and standardized transient expression assays in tobacco cells. *Plant J.* 44: 1065–1076.
- 630 Donnelly, M.L.L., ten Dam, E., Gani, D., Luke, G., Ryan, M.D., Mendoza, H., and Hughes, L.E.  
631 (2001a). The “cleavage” activities of foot-and-mouth disease virus 2A site-directed mutants  
632 and naturally occurring “2A-like” sequences. *Journal of General Virology* 82: 1027–1041.
- 633 Donnelly, M.L.L., Luke, G., Mehrotra, A., Li, X., Hughes, L.E., Gani, D., and Ryan, M.D. (2001b).  
634 Analysis of the aphthovirus 2A/2B polyprotein “cleavage” mechanism indicates not a  
635 proteolytic reaction, but a novel translational effect: a putative ribosomal “skip.” *J. Gen.*  
636 *Virol.* 82: 1013–1025.
- 637 Donnelly, M.L.L., Ryan, M.D., Mehrotra, A., Gani, D., Hughes, L.E., Luke, G., and Li, X. (2001c).

- 638 Analysis of the aphthovirus 2A/2B polyprotein “cleavage” mechanism indicates not a  
639 proteolytic reaction, but a novel translational effect: a putative ribosomal “skip.” *Journal of*  
640 *General Virology* 82: 1013–1025.
- 641 Doronina, V.A., Wu, C., de Felipe, P., Sachs, M.S., Ryan, M.D., and Brown, J.D. (2008). Site-  
642 specific release of nascent chains from ribosomes at a sense codon. *Mol. Cell. Biol.* 28:  
643 4227–4239.
- 644 El Amrani, A., Barakate, A., Askari, B.M., Li, X., Roberts, A.G., Ryan, M.D., and Halpin, C.  
645 (2004). Coordinate expression and independent subcellular targeting of multiple proteins  
646 from a single transgene. *Plant Physiol.* 135: 16–24.
- 647 Elmayan, T. and Vaucheret, H. (1996). Expression of single copies of a strongly expressed 35S  
648 transgene can be silenced post-transcriptionally. *Plant J.* 9: 787–797.
- 649 Fang, J., Qian, J.-J., Yi, S., Harding, T.C., Tu, G.H., VanRoey, M., and Jooss, K. (2005). Stable  
650 antibody expression at therapeutic levels using the 2A peptide. *Nat. Biotechnol.* 23: 584–  
651 590.
- 652 de Felipe, P., Hughes, L.E., Ryan, M.D., and Brown, J.D. (2003). Co-translational,  
653 intraribosomal cleavage of polypeptides by the foot-and-mouth disease virus 2A peptide. *J.*  
654 *Biol. Chem.* 278: 11441–11448.
- 655 Flematti, G.R., Ghisalberti, E.L., Dixon, K.W., and Trengove, R.D. (2004). A compound from  
656 smoke that promotes seed germination. *Science* 305: 977.
- 657 François, I.E.J.A., De Bolle, M.F.C., Dwyer, G., Goderis, I.J.W.M., Wouters, P.F.J., Verhaert,  
658 P.D., Proost, P., Schaaper, W.M.M., Cammue, B.P.A., and Broekaert, W.F. (2002).  
659 Transgenic expression in *Arabidopsis* of a polyprotein construct leading to production of  
660 two different antimicrobial proteins. *Plant Physiol.* 128: 1346–1358.
- 661 François, I.E.J.A., Isabelle E J, Van Hemelrijck, W., Aerts, A.M., Wouters, P.F.J., Proost, P.,  
662 Broekaert, W.F., and Cammue, B.P.A. (2004). Processing in *Arabidopsis thaliana* of a  
663 heterologous polyprotein resulting in differential targeting of the individual plant defensins.  
664 *Plant Science* 166: 113–121.
- 665 Genové, G., Glick, B.S., and Barth, A.L. (2005). Brighter reporter genes from multimerized  
666 fluorescent proteins. *Biotechniques* 39: 814, 816, 818 passim.
- 667 Grefen, C., Donald, N., Hashimoto, K., Kudla, J., Schumacher, K., and Blatt, M.R. (2010). A  
668 ubiquitin-10 promoter-based vector set for fluorescent protein tagging facilitates temporal  
669 stability and native protein distribution in transient and stable expression studies. *Plant J.*  
670 64: 355–365.
- 671 Gutjahr, C. et al. (2015). Rice perception of symbiotic arbuscular mycorrhizal fungi requires the  
672 karrikin receptor complex. *Science* 350: 1521–1524.
- 673 Halpin, C. (2005). Gene stacking in transgenic plants--the challenge for 21st century plant  
674 biotechnology. *Plant Biotechnol. J.* 3: 141–155.
- 675 Halpin, C., Cooke, S.E., Barakate, A., El Amrani, A., and Ryan, M.D. (1999). Self-processing  
676 2A-polyproteins--a system for co-ordinate expression of multiple proteins in transgenic

- 677 plants. *Plant J.* 17: 453–459.
- 678 Holst, J., Szymczak-Workman, A.L., Vignali, K.M., Burton, A.R., Workman, C.J., and Vignali,  
679 D.A.A. (2006). Generation of T-cell receptor retrogenic mice. *Nat. Protoc.* 1: 406–417.
- 680 Jiang, L. et al. (2013). DWARF 53 acts as a repressor of strigolactone signalling in rice. *Nature*  
681 504: 401–405.
- 682 Kajiyama, N. and Nakano, E. (1991). Isolation and characterization of mutants of firefly  
683 luciferase which produce different colors of light. *Protein Eng.* 4: 691–693.
- 684 Kato, H. et al. (2019). Design principles of a minimal auxin response system. *bioRxiv*: 760876.
- 685 Kimata, Y., Kato, T., Higaki, T., Kurihara, D., Yamada, T., Segami, S., Morita, M.T., Maeshima,  
686 M., Hasezawa, S., Higashiyama, T., Tasaka, M., and Ueda, M. (2019). Polar vacuolar  
687 distribution is essential for accurate asymmetric division of *Arabidopsis* zygotes. *Proc. Natl.*  
688 *Acad. Sci. U. S. A.* 116: 2338–2343.
- 689 Kim, J.H., Lee, S.-R., Li, L.-H., Park, H.-J., Park, J.-H., Lee, K.Y., Kim, M.-K., Shin, B.A., and  
690 Choi, S.-Y. (2011). High cleavage efficiency of a 2A peptide derived from porcine  
691 teschovirus-1 in human cell lines, zebrafish and mice. *PLoS One* 6: e18556.
- 692 Koo, J., Kim, Y., Kim, J., Yeom, M., Lee, I.C., and Nam, H.G. (2007). A GUS/luciferase fusion  
693 reporter for plant gene trapping and for assay of promoter activity with luciferin-dependent  
694 control of the reporter protein stability. *Plant Cell Physiol.* 48: 1121–1131.
- 695 Larrieu, A. et al. (2015). A fluorescent hormone biosensor reveals the dynamics of jasmonate  
696 signalling in plants. *Nat. Commun.* 6: 6043.
- 697 Liang, Y., Ward, S., Li, P., Bennett, T., and Leyser, O. (2016). SMAX1-LIKE7 Signals from the  
698 Nucleus to Regulate Shoot Development in *Arabidopsis* via Partially EAR Motif-  
699 Independent Mechanisms. *Plant Cell* 28: 1581–1601.
- 700 Liu, Z., Chen, O., Wall, J.B.J., Zheng, M., Zhou, Y., Wang, L., Ruth Vaseghi, H., Qian, L., and  
701 Liu, J. (2017). Systematic comparison of 2A peptides for cloning multi-genes in a  
702 polycistronic vector. *Sci. Rep.* 7: 2193.
- 703 Li, W., Nguyen, K.H., Chu, H.D., Van Ha, C., Watanabe, Y., Osakabe, Y., Leyva-González,  
704 M.A., Sato, M., Toyooka, K., Voges, L., and Others (2017). The karrikin receptor KAI2  
705 promotes drought resistance in *Arabidopsis thaliana*. *PLoS Genet.* 13: e1007076.
- 706 Lorens, J.B., Pearsall, D.M., Swift, S.E., Peelle, B., Armstrong, R., Demo, S.D., Ferrick, D.A.,  
707 Hitoshi, Y., Payan, D.G., and Anderson, D. (2004). Stable, stoichiometric delivery of diverse  
708 protein functions. *J. Biochem. Biophys. Methods* 58: 101–110.
- 709 Luginbuehl, L.H., El-Sharnouby, S., Wang, N., and Hibberd, J.M. (2019). Fluorescent reporters  
710 for functional analysis in rice leaves. *bioRxiv*: 649160.
- 711 Luke, G.A., Roulston, C., Tilsner, J., and Ryan, M.D. (2015). Growing Uses of 2A in Plant  
712 Biotechnology. *Biotechnology*.
- 713 Luke, G.A. and Ryan, M.D. (2018). Using the 2A Protein Coexpression System: Multicistronic  
714 2A Vectors Expressing Gene(s) of Interest and Reporter Proteins. *Methods Mol. Biol.* 1755:

- 715 31–48.
- 716 Ma, C. and Mitra, A. (2002). Expressing multiple genes in a single open reading frame with the  
717 2A region of foot-and-mouth disease virus as a linker. *Mol. Breed.* 9: 191–199.
- 718 Markova, S.V., Larionova, M.D., and Vysotski, E.S. (2019). Shining Light on the Secreted  
719 Luciferases of Marine Copepods: Current Knowledge and Applications. *Photochem.*  
720 *Photobiol.* 95: 705–721.
- 721 Marques, S.M. and Esteves da Silva, J.C.G. (2009). Firefly bioluminescence: a mechanistic  
722 approach of luciferase catalyzed reactions. *IUBMB Life* 61: 6–17.
- 723 Mašek, T., Vopalenský, V., and Pospíšek, M. (2013). The Luc2 gene enhances reliability of  
724 bicistronic assays. *Open Life Sciences* 8.
- 725 Michniewicz, M., Frick, E.M., and Strader, L.C. (2015). Gateway-compatible tissue-specific  
726 vectors for plant transformation. *BMC Res. Notes* 8: 63.
- 727 Minskaia, E., Nicholson, J., and Ryan, M.D. (2013). Optimisation of the foot-and-mouth disease  
728 virus 2A co-expression system for biomedical applications. *BMC Biotechnol.* 13: 67.
- 729 Mizuguchi, H., Xu, Z., Ishii-Watabe, A., Uchida, E., and Hayakawa, T. (2000). IRES-dependent  
730 second gene expression is significantly lower than cap-dependent first gene expression in a  
731 bicistronic vector. *Mol. Ther.* 1: 376–382.
- 732 Moyle, R.L., Carvalhais, L.C., Pretorius, L.-S., Nowak, E., Subramaniam, G., Dalton-Morgan, J.,  
733 and Schenk, P.M. (2017). An Optimized Transient Dual Luciferase Assay for Quantifying  
734 MicroRNA Directed Repression of Targeted Sequences. *Front. Plant Sci.* 8: 1631.
- 735 Nagai, T., Ibata, K., Park, E.S., Kubota, M., Mikoshiba, K., and Miyawaki, A. (2002). A variant of  
736 yellow fluorescent protein with fast and efficient maturation for cell-biological applications.  
737 *Nat. Biotechnol.* 20: 87–90.
- 738 Nakagawa, T., Kurose, T., Hino, T., Tanaka, K., Kawamukai, M., Niwa, Y., Toyooka, K.,  
739 Matsuoka, K., Jinbo, T., and Kimura, T. (2007). Development of series of gateway binary  
740 vectors, pGWBs, for realizing efficient construction of fusion genes for plant transformation.  
741 *J. Biosci. Bioeng.* 104: 34–41.
- 742 Nelson, D.C., Flematti, G.R., Ghisalberti, E.L., Dixon, K.W., and Smith, S.M. (2012). Regulation  
743 of seed germination and seedling growth by chemical signals from burning vegetation.  
744 *Annu. Rev. Plant Biol.* 63: 107–130.
- 745 Nelson, D.C., Flematti, G.R., Riseborough, J.-A., Ghisalberti, E.L., Dixon, K.W., and Smith, S.M.  
746 (2010). Karrikins enhance light responses during germination and seedling development in  
747 *Arabidopsis thaliana*. *Proc. Natl. Acad. Sci. U. S. A.* 107: 7095–7100.
- 748 Nelson, D.C., Riseborough, J.-A., Flematti, G.R., Stevens, J., Ghisalberti, E.L., Dixon, K.W., and  
749 Smith, S.M. (2009). Karrikins discovered in smoke trigger *Arabidopsis* seed germination by  
750 a mechanism requiring gibberellic acid synthesis and light. *Plant Physiol.* 149: 863–873.
- 751 Nelson, D.C., Scaffidi, A., Dun, E.A., Waters, M.T., Flematti, G.R., Dixon, K.W., Beveridge, C.A.,  
752 Ghisalberti, E.L., and Smith, S.M. (2011). F-box protein MAX2 has dual roles in karrikin and  
753 strigolactone signaling in *Arabidopsis thaliana*. *Proc. Natl. Acad. Sci. U. S. A.* 108: 8897–



- 754 8902.
- 755 Pasin, F., Kulasekaran, S., Natale, P., Simón-Mateo, C., and García, J.A. (2014). Rapid  
756 fluorescent reporter quantification by leaf disc analysis and its application in plant-virus  
757 studies. *Plant Methods* 10: 22.
- 758 Provost, E., Rhee, J., and Leach, S.D. (2007). Viral 2A peptides allow expression of multiple  
759 proteins from a single ORF in transgenic zebrafish embryos. *Genesis* 45: 625–629.
- 760 Ralley, L., Enfissi, E.M.A., Misawa, N., Schuch, W., Bramley, P.M., and Fraser, P.D. (2004).  
761 Metabolic engineering of ketocarotenoid formation in higher plants. *The Plant Journal* 39:  
762 477–486.
- 763 Randall, J. (2004). Co-ordinate expression of beta;- and delta;-zeins in transgenic tobacco.  
764 *Plant Science*.
- 765 Rizzo, M.A. and Piston, D.W. (2005). High-contrast imaging of fluorescent protein FRET by  
766 fluorescence polarization microscopy. *Biophys. J.* 88: L14–6.
- 767 Rizzo, M.A., Springer, G.H., Granada, B., and Piston, D.W. (2004). An improved cyan  
768 fluorescent protein variant useful for FRET. *Nat. Biotechnol.* 22: 445–449.
- 769 Rodriguez, E.A., Campbell, R.E., Lin, J.Y., Lin, M.Z., Miyawaki, A., Palmer, A.E., Shu, X.,  
770 Zhang, J., and Tsien, R.Y. (2017). The Growing and Glowing Toolbox of Fluorescent and  
771 Photoactive Proteins. *Trends Biochem. Sci.* 42: 111–129.
- 772 Ryan, M.D., Donnelly, M., Lewis, A., Mehrotra, A.P., Wilkie, J., and Gani, D. (1999). A Model for  
773 Nonstoichiometric, Cotranslational Protein Scission in Eukaryotic Ribosomes. *Bioorg.*  
774 *Chem.* 27: 55–79.
- 775 Ryan, M.D., King, A.M., and Thomas, G.P. (1991). Cleavage of foot-and-mouth disease virus  
776 polyprotein is mediated by residues located within a 19 amino acid sequence. *J. Gen. Virol.*  
777 72 ( Pt 11): 2727–2732.
- 778 Samalova, M., Fricker, M., and Moore, I. (2006). Ratiometric Fluorescence-Imaging Assays of  
779 Plant Membrane Traffic Using Polyproteins. *Traffic* 7: 1701–1723.
- 780 Samodelov, S.L., Beyer, H.M., Guo, X., Augustin, M., Jia, K.-P., Baz, L., Ebenhöf, O., Beyer,  
781 P., Weber, W., Al-Babili, S., and Zurbriggen, M.D. (2016). StrigoQuant: A genetically  
782 encoded biosensor for quantifying strigolactone activity and specificity. *Sci Adv* 2:  
783 e1601266.
- 784 Shaner, N.C., Lambert, G.G., Chamma, A., Ni, Y., Cranfill, P.J., Baird, M.A., Sell, B.R., Allen,  
785 J.R., Day, R.N., Israelsson, M., Davidson, M.W., and Wang, J. (2013). A bright monomeric  
786 green fluorescent protein derived from *Branchiostoma lanceolatum*. *Nat. Methods* 10: 407–  
787 409.
- 788 Shen, H., Luong, P., and Huq, E. (2007). The F-box protein MAX2 functions as a positive  
789 regulator of photomorphogenesis in *Arabidopsis*. *Plant Physiol.* 145: 1471–1483.
- 790 Soundappan, I., Bennett, T., Morffy, N., Liang, Y., Stanga, J.P., Abbas, A., Leyser, O., and  
791 Nelson, D.C. (2015). SMAX1-LIKE/D53 Family Members Enable Distinct MAX2-Dependent  
792 Responses to Strigolactones and Karrikins in *Arabidopsis*. *Plant Cell* 27: 3143–3159.

- 793 Stanga, J.P., Morffy, N., and Nelson, D.C. (2016). Functional redundancy in the control of  
794 seedling growth by the karrikin signaling pathway. *Planta* 243: 1397–1406.
- 795 Stanga, J.P., Smith, S.M., Briggs, W.R., and Nelson, D.C. (2013). SUPPRESSOR OF MORE  
796 AXILLARY GROWTH2 1 controls seed germination and seedling development in  
797 *Arabidopsis*. *Plant Physiol.* 163: 318–330.
- 798 Steiert, F., Petrov, E.P., Schultz, P., Schwille, P., and Weidemann, T. (2018). Photophysical  
799 Behavior of mNeonGreen, an Evolutionarily Distant Green Fluorescent Protein. *Biophys. J.*  
800 114: 2419–2431.
- 801 Stirnberg, P., Furner, I.J., and Ottoline Leyser, H.M. (2007). MAX2 participates in an SCF  
802 complex which acts locally at the node to suppress shoot branching. *Plant J.* 50: 80–94.
- 803 Stoddard, A. and Rolland, V. (2019). I see the light! Fluorescent proteins suitable for cell  
804 wall/apoplast targeting in *Nicotiana benthamiana* leaves. *Plant Direct* 3: e00112.
- 805 Sun, X.-D. and Ni, M. (2011). HYPOSENSITIVE TO LIGHT, an alpha/beta fold protein, acts  
806 downstream of ELONGATED HYPOCOTYL 5 to regulate seedling de-etiolation. *Mol. Plant*  
807 4: 116–126.
- 808 Swarbreck, S.M., Guerringue, Y., Matthus, E., Jamieson, F.J.C., and Davies, J.M. (2019).  
809 Impairment in karrikin but not strigolactone sensing enhances root skewing in *Arabidopsis*  
810 *thaliana*. *Plant J.* 98: 607–621.
- 811 Szymczak, A.L. and Vignali, D.A.A. (2005). Development of 2A peptide-based strategies in the  
812 design of multicistronic vectors. *Expert Opin. Biol. Ther.* 5: 627–638.
- 813 Szymczak, A.L., Workman, C.J., Wang, Y., Vignali, K.M., Dilioglou, S., Vanin, E.F., and Vignali,  
814 D.A.A. (2004a). Correction of multi-gene deficiency in vivo using a single “self-cleaving” 2A  
815 peptide-based retroviral vector. *Nat. Biotechnol.* 22: 589–594.
- 816 Szymczak, A.L., Workman, C.J., Wang, Y., Vignali, K.M., Dilioglou, S., Vanin, E.F., and Vignali,  
817 D.A.A. (2004b). Correction of multi-gene deficiency in vivo using a single “self-cleaving” 2A  
818 peptide-based retroviral vector. *Nature Biotechnology* 22: 589–594.
- 819 Tafreshi, N.K., Sadeghizadeh, M., Emamzadeh, R., Ranjbar, B., Naderi-Manesh, H., and  
820 Hosseinkhani, S. (2008). Site-directed mutagenesis of firefly luciferase: implication of  
821 conserved residue(s) in bioluminescence emission spectra among firefly luciferases.  
822 *Biochem. J* 412: 27–33.
- 823 Tailor, R.H., Acland, D.P., Attenborough, S., Cammue, B.P., Evans, I.J., Osborn, R.W., Ray,  
824 J.A., Rees, S.B., and Broekaert, W.F. (1997). A novel family of small cysteine-rich  
825 antimicrobial peptides from seed of *Impatiens balsamina* is derived from a single precursor  
826 protein. *J. Biol. Chem.* 272: 24480–24487.
- 827 Takada, S. and Jürgens, G. (2007). Transcriptional regulation of epidermal cell fate in the  
828 *Arabidopsis* embryo. *Development* 134: 1141–1150.
- 829 Tannous, B.A., Kim, D.-E., Fernandez, J.L., Weissleder, R., and Breakefield, X.O. (2005).  
830 Codon-optimized *Gaussia* luciferase cDNA for mammalian gene expression in culture and  
831 in vivo. *Mol. Ther.* 11: 435–443.

- 832 Thorn, K. (2017). Genetically encoded fluorescent tags. *Mol. Biol. Cell* 28: 848–857.
- 833 Urwin, P.E., Zubko, E.I., and Atkinson, H.J. (2002). The biotechnological application and  
834 limitation of IRES to deliver multiple defence genes to plant pathogens. *Physiological and*  
835 *Molecular Plant Pathology* 61: 103–108.
- 836 Urwin, P., Yi, L., Martin, H., Atkinson, H., and Gilmartin, P.M. (2000). Functional characterization  
837 of the EMCV IRES in plants. *Plant J.* 24: 583–589.
- 838 Vaucheret, H., Béclin, C., Elmayan, T., Feuerbach, F., Godon, C., Morel, J.-B., Mourrain, P.,  
839 Palauqui, J.-C., and Vernhettes, S. (1998). Transgene-induced gene silencing in plants.  
840 *The Plant Journal* 16: 651–659.
- 841 Villaécija-Aguilar, J.A., Hamon-Josse, M., Carbonnel, S., Kretschmar, A., Schmid, C., Dawid, C.,  
842 Bennett, T., and Gutjahr, C. (2019). SMAX1/SMXL2 regulate root and root hair  
843 development downstream of KAI2-mediated signalling in Arabidopsis. *PLOS Genetics* 15:  
844 e1008327.
- 845 Wang, L., Wang, B., Jiang, L., Liu, X., Li, X., Lu, Z., Meng, X., Wang, Y., Smith, S.M., and Li, J.  
846 (2015). Strigolactone Signaling in Arabidopsis Regulates Shoot Development by Targeting  
847 D53-Like SMXL Repressor Proteins for Ubiquitination and Degradation. *Plant Cell* 27:  
848 3128–3142.
- 849 Waters, M.T., Nelson, D.C., Scaffidi, A., Flematti, G.R., Sun, Y.K., Dixon, K.W., and Smith, S.M.  
850 (2012). Specialisation within the DWARF14 protein family confers distinct responses to  
851 karrikins and strigolactones in Arabidopsis. *Development* 139: 1285–1295.
- 852 Waters, M.T., Scaffidi, A., Flematti, G., and Smith, S.M. (2015). Substrate-Induced Degradation  
853 of the  $\alpha/\beta$ -Fold Hydrolase KARRIKIN INSENSITIVE2 Requires a Functional Catalytic Triad  
854 but Is Independent of MAX2. *Mol. Plant* 8: 814–817.
- 855 Welsh, J.P., Patel, K.G., Manthiram, K., and Swartz, J.R. (2009). Multiply mutated *Gussia*  
856 *luciferases* provide prolonged and intense bioluminescence. *Biochem. Biophys. Res.*  
857 *Commun.* 389: 563–568.
- 858 Wend, S., Dal Bosco, C., Kämpf, M.M., Ren, F., Palme, K., Weber, W., Dovzhenko, A., and  
859 Zurbriggen, M.D. (2013). A quantitative ratiometric sensor for time-resolved analysis of  
860 auxin dynamics. *Sci. Rep.* 3: 2052.
- 861 Wood, K.V. (1995). Marker proteins for gene expression. *Current Opinion in Biotechnology* 6:  
862 50–58.
- 863 Wroblewski, T., Tomczak, A., and Michelmore, R. (2005). Optimization of *Agrobacterium*-  
864 mediated transient assays of gene expression in lettuce, tomato and Arabidopsis. *Plant*  
865 *Biotechnol. J.* 3: 259–273.
- 866 Yang, Y., Li, R., and Qi, M. (2000). In vivo analysis of plant promoters and transcription factors  
867 by agroinfiltration of tobacco leaves. *Plant J.* 22: 543–551.
- 868 Zhang, B., Rapolu, M., Kumar, S., Gupta, M., Liang, Z., Han, Z., Williams, P., and Su, W.W.  
869 (2017). Coordinated protein co-expression in plants by harnessing the synergy between an  
870 intein and a viral 2A peptide. *Plant Biotechnol. J.* 15: 718–728.

871 Zhou, F. et al. (2013). D14-SCF(D3)-dependent degradation of D53 regulates strigolactone  
872 signalling. *Nature* 504: 406–410.

873

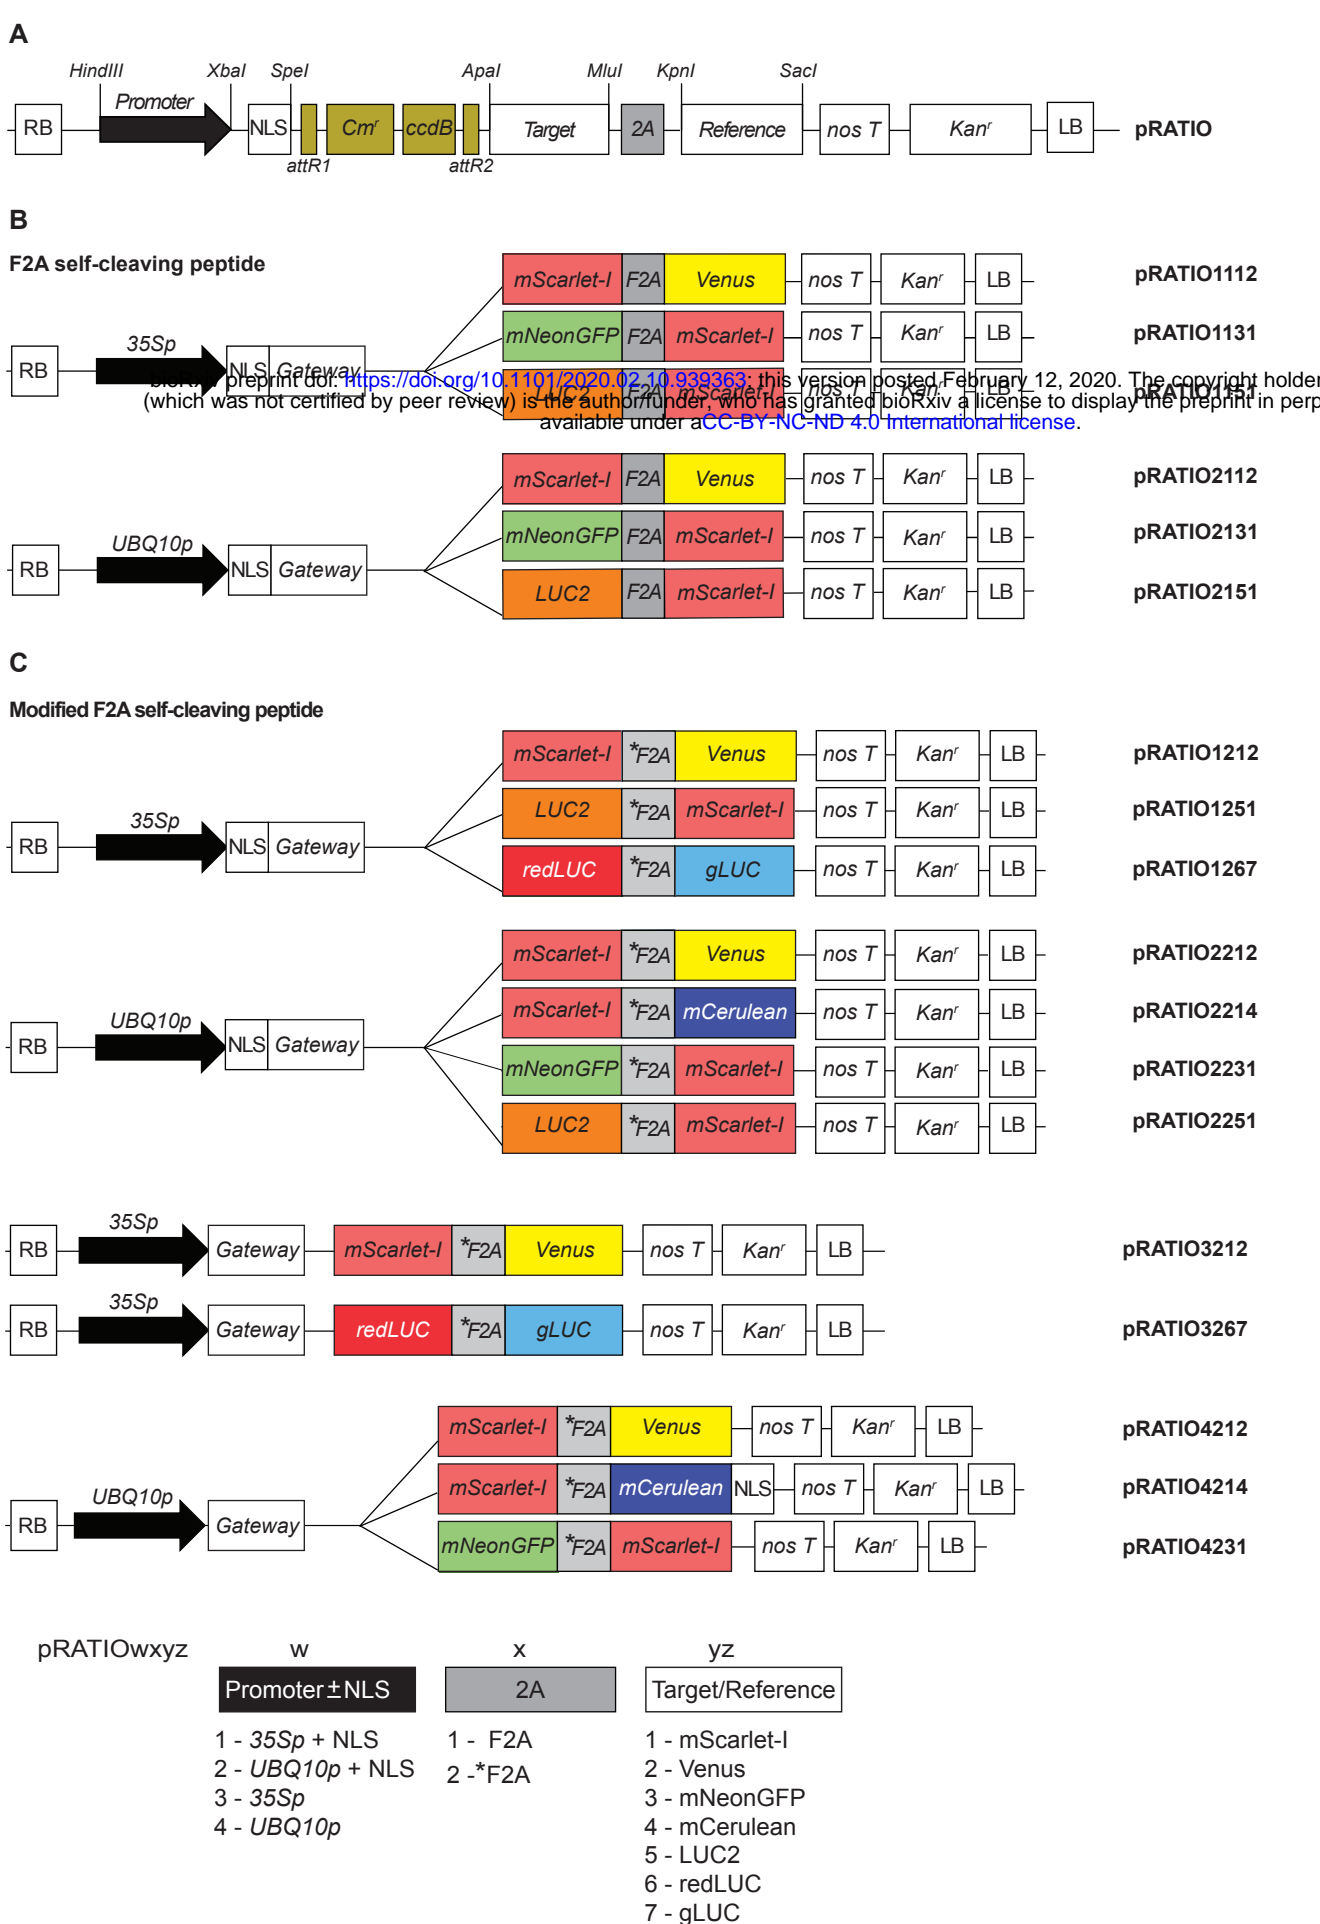

**Figure 1.** Schematic of the pRATIO vector series.

**(A)** General structure of pRATIO vector. Expression is either driven by *CaMV35S* (1000/3000 series) or *UBQ10* promoter (2000/4000 series). Unique restriction sites flank the promoter, NLS, *ccdB* cassette, target protein, 2A sequence, and the reference protein. The expression cassettes are in pGWB401 or pGWB402 backbones. T-DNA selection is kanamycin resistance.

**(B, C)** pRATIO incorporating either **(B)** F2A self-cleaving peptide or **(C)** modified F2A (\*F2A) protein. LUC2, firefly luciferase; redLUC, red firefly luciferase; gLUC, Gaussia Dura luciferase; RB, right border; LR, left border; Cm<sup>r</sup>, chloramphenicol-resistance marker (chloramphenicol acetyl transferase) used for selection in bacteria; *ccdB*, negative selection marker used in the bacteria; nosT, NOS terminator to stop the transcription.

The GenBank accession numbers are listed in Table S5.

A

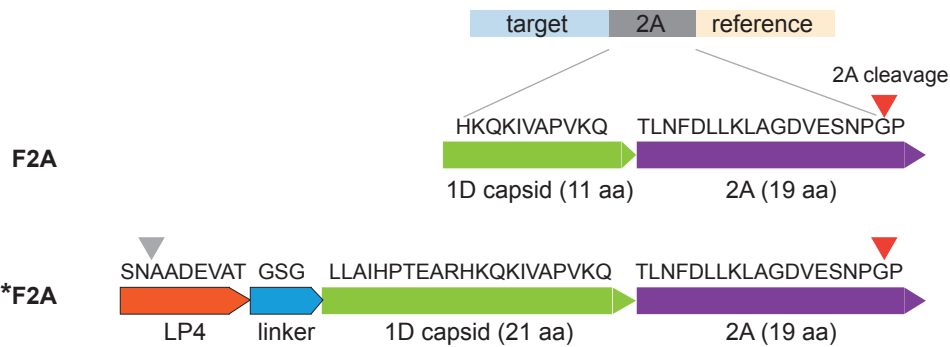

B

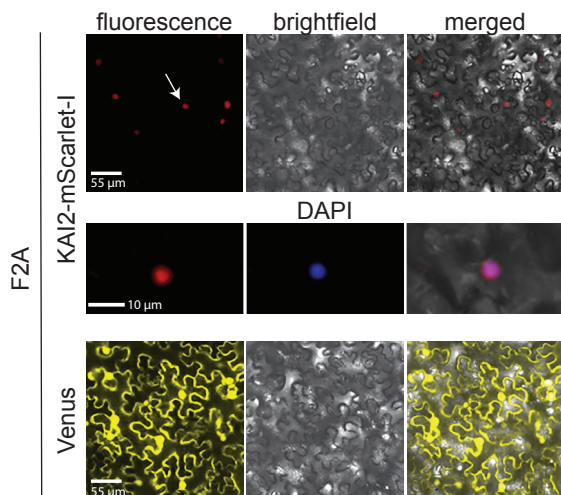

C

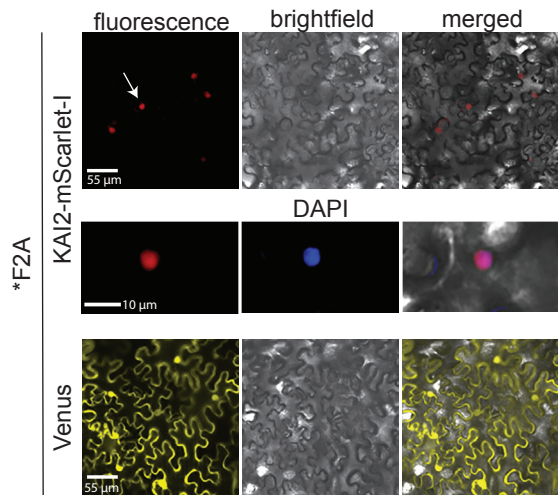

D

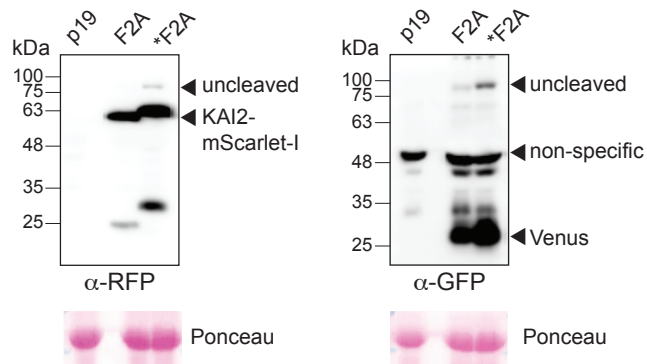

E

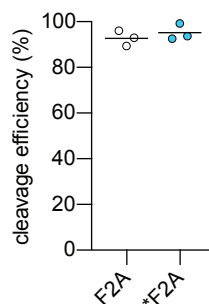

F

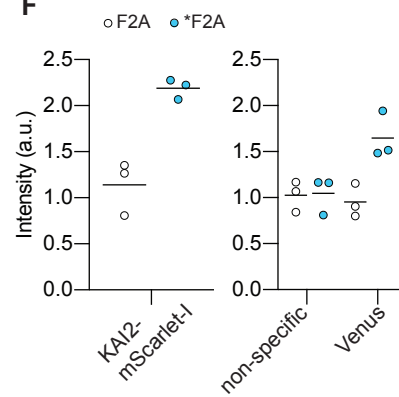

**Figure 2.** Both F2A and \*F2A peptides allow the efficient production of two independent polypeptides in tobacco.

**(A)** Amino acid sequences of the two 2As used, foot and mouth disease virus 2A (F2A) and a longer F2A sequence (\*F2A). LP4 plant peptide (-SNAADEVAT-) and a GSG linker was added to the N-terminus of \*F2A to improve the cleavage efficiency. The site of protease cleavage and 2A mediated cleavage is indicated by green and red arrows, respectively.

**(B, C)** Patterns of localization of mScarlet-I and Venus in *N. benthamiana* epidermal cells expressing **(B)** pRATIO1112-KAI2 and **(C)** pRATIO1212-KAI2. Venus (yellow) localizes throughout the cells whereas mScarlet-I (red): NLS-KAI2-mScarlet-I remains tightly restricted to the nucleus as expected if they are produced as two independent polypeptides, suggesting that both 2A peptides are correctly split up. Arrows indicate nuclear localization.

**(D)** Western blot analysis of cleavage efficiency of two types of 2A self-cleaving peptides in the tobacco leaf epidermal cells. The cleavage efficiency was assessed using RFP antibody to detect cleaved KAI2-mScarlet-I and the uncleaved KAI2-mScarlet-I-2A-Venus, and GFP antibody to detect cleaved Venus and uncleaved protein. Leaf transformed with p19 served as the control. The Ponceau membrane staining of the most intense band at 55 kDa (presumably Rubisco) was used as a loading control.

**(E)** Quantitation of cleavage efficiency of 2A peptides in tobacco.

Cleavage efficiency = cleaved form/(cleaved form+uncleaved form). The amount of each form was estimated from its band intensity on the Western blot measured by Image Studio Light (LI-COR). Bar indicates mean, n = 3.

**(F)** Comparison of the amount of cleaved proteins between pRATIO1112 (F2A) and pRATIO1212 (\*F2A). The amount is estimated as depicted in **(E)**. Bar indicates mean, n = 3.

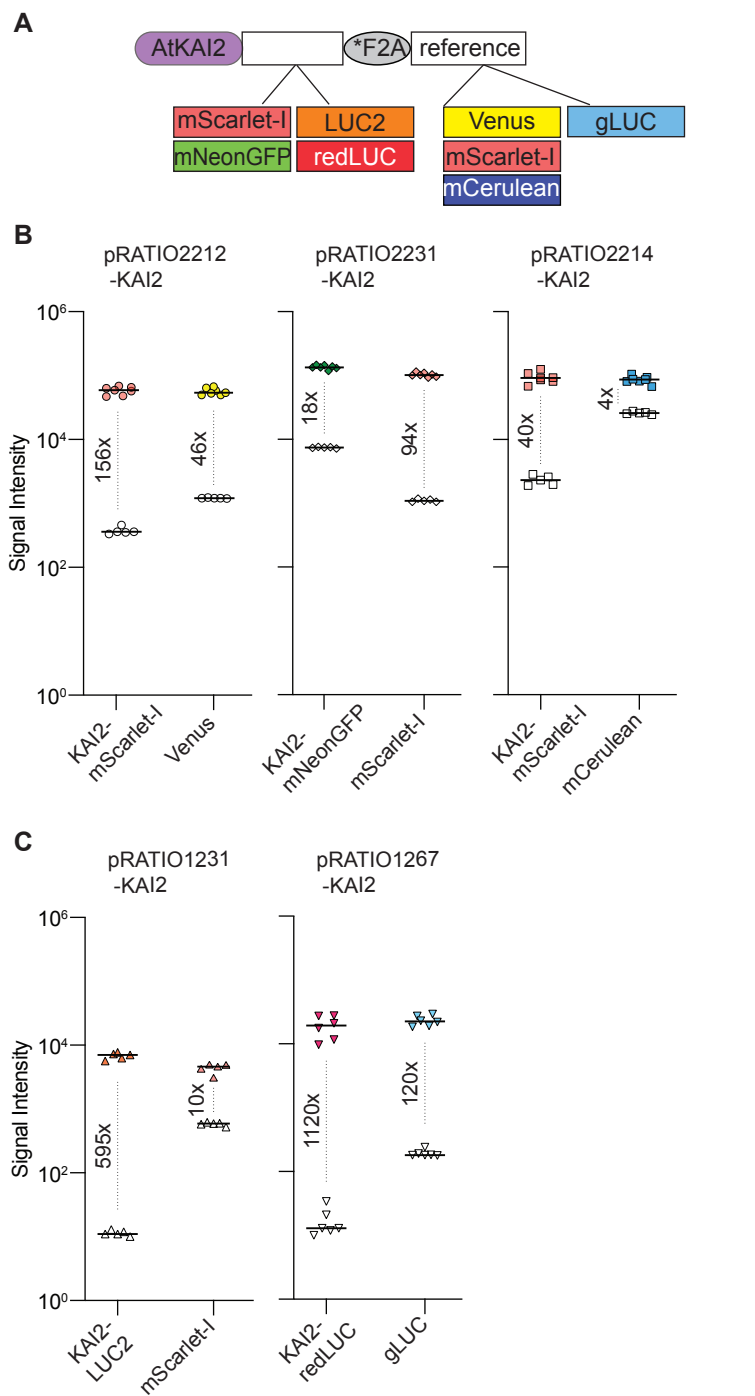

**Figure 3.** Comparison of signal intensity among pRATIO vectors with different combination of target and reference proteins.

**(A)** Schematic of the pRATIO vector expressing Arabidopsis KAI2 cDNA (AtKAI2) fused to different target and reference proteins, **(B, C)** The scatter dot plots comparing signal intensities of the reporter proteins. Leaves transformed with p19 served as the negative control for background signal (open symbols). Fluorescence and luminescence signals were measured in tobacco leaf epidermal cells 72 hpi. Median is shown,  $n = 4-6$  leaf discs. The numbers indicate fold increase in signal intensity over background.

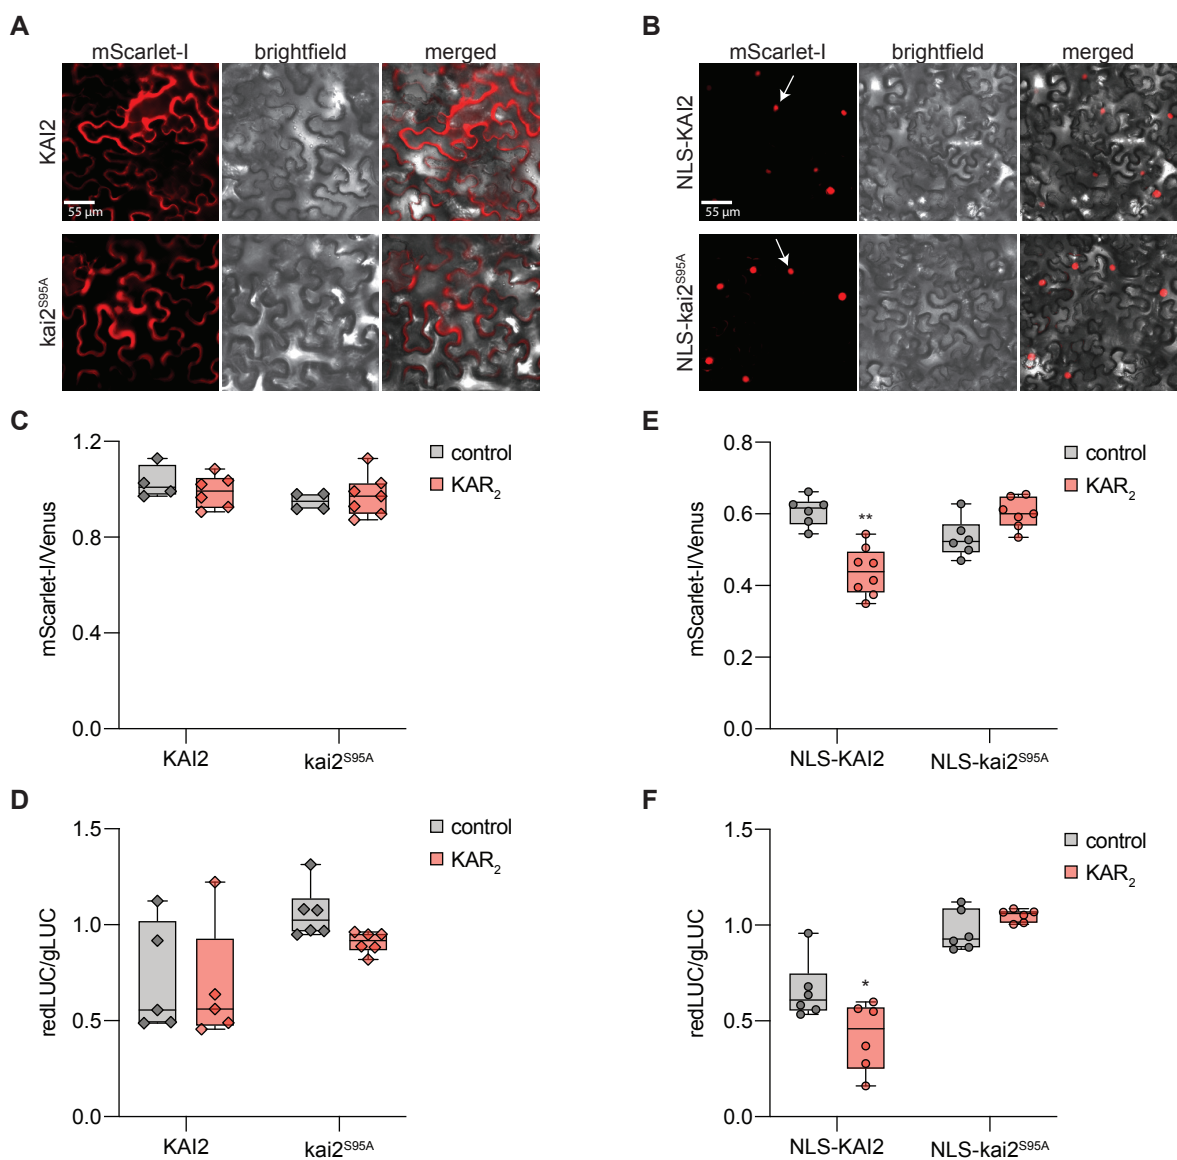

**Figure 4.** Ratiometric detection of KAI2 degradation in tobacco.

**(A, B)** *N.benthamiana* leaf epidermal cells expressing wild type *Arabidopsis* KAI2 (AtKAI2) and catalytically inactive mutant of KAI2 (kai2<sup>S95A</sup>) fused to mScarlet-I in **(A)** pRATIO4212 and **(B)** pRATIO2212. Images were visualized using the RFP epifluorescence settings. Arrows indicate nuclear localization. Scale bar = 55 μm.

**(C-F)** Box and whisker plots showing KAR<sub>2</sub> induced degradation response of KAI2 and kai2<sup>S95A</sup> in transiently transformed tobacco epidermal cells. Degradation response was monitored in **(C, D)** pRATIO4212 and pRATIO3267 (without NLS fusion), **(E, F)** pRATIO2212 and pRATIO1267 (KAI2/kai2<sup>S95A</sup> cDNA fused with nuclear localization signal (NLS) at N-terminus in the presence of 10 μM KAR<sub>2</sub> or 0.02% acetone control. mScarlet-I-to-Venus (mScarlet-I/Venus) and redLUC-to-gLUC (redLUC/gLUC) ratios are plotted on the y-axis. n = 4-7 leaf discs. \* *P* < 0.01; \*\* *P* < 0.001, Mann-Whitney U test comparisons to control treatment.
